# Supplementary material for: Inadequate socialisation, inactivity, and urban living environment are associated with social fearfulness in pet dogs
Source: PubMed Central journal article supplement (PMC7044223; doi:10.1038/s41598-020-60546-w), 2020-02-26
Supplement: 41598_2020_60546_MOESM2_ESM.pdf [file 41598_2020_60546_MOESM2_ESM.pdf]

## Supplementary Information

Inadequate socialisation, inactivity, and urban living environment  
are associated with social fearfulness in pet dogs

Jenni Puurunen<sup>1,2</sup>, Emma Hakanen<sup>1,2</sup>, Milla K. Salonen<sup>1,2</sup>, Salla Mikkola<sup>1,2</sup>, Sini  
Sulkama<sup>1,2</sup>, César Araujo<sup>1,2</sup>, Hannes Lohi<sup>1,2\*</sup>

<sup>1</sup> Department of Veterinary Biosciences and Department of Medical and Clinical Genetics,  
University of Helsinki, Helsinki, Finland

<sup>2</sup> Folkhälsan Research Center, Helsinki, Finland

\* Corresponding author:

Hannes Lohi, PhD, Professor

Email: [hannes.lohi@helsinki.fi](mailto:hannes.lohi@helsinki.fi) (HL)

Supplementary Table S1. Descriptive statistics. SD = standard deviation. N(fear of dogs) = 5,973, N(fear of strangers) = 5,932.

| <b>Fear of dogs</b>     |                       | <b>mean</b> | <b>SD</b> | <b>Fear of strangers</b> |                       | <b>mean</b> | <b>SD</b> |
|-------------------------|-----------------------|-------------|-----------|--------------------------|-----------------------|-------------|-----------|
| Age (years)             |                       | 4.61        | 3.26      | Age (years)              |                       | 4.65        | 3.28      |
| Socialisation score     |                       | 21.85       | 4.34      | Socialisation score      |                       | 22.02       | 4.19      |
| Urban environment score |                       | -0.038      | 1.39      | Urban environment score  |                       | 0.008       | 1.39      |
|                         |                       | <b>N</b>    | <b>%</b>  |                          |                       | <b>N</b>    | <b>%</b>  |
| Sex                     | Female                | 3071        | 51.41     | Sex                      | Female                | 3023        | 50.96     |
|                         | Male                  | 2902        | 48.59     |                          | Male                  | 2909        | 49.04     |
| Sterilisation           | Intact                | 4409        | 73.82     | Sterilisation            | Intact                | 4346        | 73.26     |
|                         | Neutered              | 1564        | 26.18     |                          | Neutered              | 1586        | 26.74     |
| Breed                   | Border Collie         | 156         | 2.61      | Breed                    | Border Collie         | 142         | 2.39      |
|                         | Cairn Terrier         | 42          | 0.70      |                          | Chihuahua             | 49          | 0.83      |
|                         | Chihuahua             | 50          | 0.84      |                          | Chinese Crested Dog   | 63          | 1.06      |
|                         | Chinese Crested Dog   | 72          | 1.21      |                          | Coton de Tuléar       | 52          | 0.88      |
|                         | Coton de Tuléar       | 47          | 0.79      |                          | Finnish Lapponian Dog | 242         | 4.08      |
|                         | Finnish Lapponian Dog | 213         | 3.57      |                          | German Shepherd Dog   | 210         | 3.54      |
|                         | German Shepherd Dog   | 204         | 3.42      |                          | Golden Retriever      | 80          | 1.35      |
|                         | Golden Retriever      | 81          | 1.36      |                          | Jack Russell Terrier  | 75          | 1.26      |
|                         | Jack Russell Terrier  | 65          | 1.09      |                          | Labrador Retriever    | 217         | 3.66      |
|                         | Labrador Retriever    | 221         | 3.7       |                          | Lagotto Romagnolo     | 117         | 1.97      |
|                         | Lagotto Romagnolo     | 124         | 2.08      |                          | Lapponian Herder      | 135         | 2.28      |
|                         | Lapponian Herder      | 121         | 2.03      |                          | Medium size Spitz     | 60          | 1.01      |
|                         | Medium size Spitz     | 52          | 0.87      |                          | Miniature poodle      | 122         | 2.06      |
|                         | Miniature poodle      | 121         | 2.03      |                          | Miniature Schnauzer   | 96          | 1.62      |
|                         | Miniature Schnauzer   | 99          | 1.66      |                          | Other                 | 3589        | 60.50     |
|                         | Other                 | 3491        | 58.45     |                          | Rough Collie          | 125         | 2.11      |
|                         | Pembroke Welsh Corgi  | 37          | 0.62      |                          | Shetland Sheepdog     | 168         | 2.83      |
|                         | Rough Collie          | 126         | 2.11      |                          | Smooth Collie         | 93          | 1.57      |
|                         | Shetland Sheepdog     | 165         | 2.76      |                          | Spanish Water Dog     | 108         | 1.82      |
|                         | Smooth Collie         | 99          | 1.66      |                          | Wheaten Terrier       | 189         | 3.19      |
| Body size               | Small                 | 1340        | 22.43     | Body size                | Small                 | 1371        | 23.11     |
|                         | Medium                | 2004        | 33.55     |                          | Medium                | 2061        | 34.74     |
|                         | Large                 | 2629        | 44.01     |                          | Large                 | 2500        | 42.14     |
| Activities/training     | Never/seldom          | 1386        | 23.20     | Activities/training      | Never/seldom          | 1402        | 23.63     |
|                         | Sometimes             | 1714        | 28.70     |                          | Sometimes             | 1700        | 28.66     |
|                         | At least weekly       | 2873        | 48.10     |                          | At least weekly       | 2830        | 47.71     |
| Daily exercise          | < 1 hour              | 389         | 6.51      | Family size              | Single                | 1166        | 19.66     |
|                         | 1-2 hours             | 2358        | 39.48     |                          | Couple                | 2632        | 44.37     |
|                         | 2-3 hours             | 2354        | 39.41     |                          | One child             | 699         | 11.78     |
|                         | > 3 hours             | 872         | 14.60     |                          | Two children          | 731         | 12.32     |
|                         |                       |             |           | Larger family            | 704                   | 11.87       |           |
| Weaning age             |                       |             |           | Weaning age              | < 7 weeks             | 526         | 8.87      |
|                         |                       |             |           |                          | at 7 weeks            | 1934        | 32.60     |
|                         |                       |             |           |                          | at 8 weeks            | 2167        | 36.53     |
|                         |                       |             |           |                          | > 8 weeks             | 1305        | 22.00     |

Supplementary Table S2. Contrasts between levels of categorical variables in the 'fear of dogs' logistic regression analysis. P-values are controlled for false discovery rate except for *a priori* contrasts. *A priori* effects are denoted with \*. Significant effects are emboldened (p-value < 0.05). OR = odds ratio, CI = confidence limit. N = 5,973.

| Variable            | Contrast                                                                                                                                                          | OR   | Lower 95%CI | Upper 95%CI | p                  |
|---------------------|-------------------------------------------------------------------------------------------------------------------------------------------------------------------|------|-------------|-------------|--------------------|
| Sex                 | Male vs. female                                                                                                                                                   | 0.65 | 0.480       | 0.867       | <b>0.0037*</b>     |
| Sterilisation       | Intact vs. neutered                                                                                                                                               | 0.34 | 0.248       | 0.471       | <b>&lt; 0.001</b>  |
| Sex*sterilisation   | Intact male vs. neutered male                                                                                                                                     | 0.45 | 0.358       | 0.562       | <b>&lt; 0.001</b>  |
|                     | Intact female vs. neutered female                                                                                                                                 | 0.76 | 0.616       | 0.941       | <b>0.036</b>       |
|                     | Intact male vs. intact female                                                                                                                                     | 0.62 | 0.521       | 0.730       | <b>&lt; 0.001</b>  |
|                     | Neutered male vs. neutered female                                                                                                                                 | 1.10 | 0.820       | 1.334       | 0.807              |
|                     | Intact male vs. neutered female                                                                                                                                   | 0.47 | 0.377       | 0.584       | <b>&lt; 0.001</b>  |
|                     | Intact female vs. neutered male                                                                                                                                   | 0.73 | 0.585       | 0.905       | <b>0.017</b>       |
| Body size           | Small vs. medium                                                                                                                                                  | 2.04 | 1.630       | 2.550       | <b>&lt; 0.001*</b> |
|                     | Small vs. large                                                                                                                                                   | 3.29 | 2.640       | 4.090       | <b>&lt; 0.001</b>  |
|                     | Medium vs. large                                                                                                                                                  | 1.61 | 1.280       | 2.030       | <b>&lt; 0.001</b>  |
| Activities/training | Never/seldom vs. sometimes                                                                                                                                        | 1.54 | 1.278       | 1.850       | <b>&lt; 0.001</b>  |
|                     | Never/seldom vs. at least weekly                                                                                                                                  | 1.56 | 1.305       | 1.860       | <b>&lt; 0.001</b>  |
|                     | Sometimes vs. at least weekly                                                                                                                                     | 1.01 | 0.853       | 1.210       | 0.919              |
| Daily exercise      | < 1 hour vs. 1-2 hours                                                                                                                                            | 1.05 | 0.809       | 1.370       | 0.794              |
|                     | < 1 hour vs. 2-3 hours                                                                                                                                            | 1.23 | 0.940       | 1.620       | 0.226              |
|                     | < 1 hour vs. > 3hours                                                                                                                                             | 1.58 | 1.137       | 2.190       | <b>0.022</b>       |
|                     | 1-2 hours vs. 2-3 hours                                                                                                                                           | 1.17 | 1.004       | 1.370       | 0.099              |
|                     | 1-2 hours vs. > 3 hours                                                                                                                                           | 1.50 | 1.178       | 1.900       | <b>0.005</b>       |
|                     | 2-3 hours vs. > 3 hours                                                                                                                                           | 1.28 | 1.002       | 1.630       | 0.106              |
| Breed               | Chihuahua, Jack Russell Terrier, Lagotto Romagnolo, and Shetland Sheepdog vs. German Shepherd Dog, Golden Retriever, Labrador Retriever, and Staff. Bull Terrier. | 1.57 | 1.060       | 2.330       | <b>0.024*</b>      |

Supplementary Table S3. Significant pairwise breed differences in the ‘fear of dogs’ analysis. All p-values are FDR-controlled. OR = odds ratio, CI = confidence limit. N = 5,973.

| Breed contrast                                 | OR   | Lower 95%CI | Upper 95%CI | p       |
|------------------------------------------------|------|-------------|-------------|---------|
| Border Collie vs. Cairn Terrier                | 5.54 | 2.137       | 14.340      | 0.003   |
| Border Collie vs. Jack Russell Terrier         | 2.51 | 1.217       | 5.176       | 0.038   |
| Border Collie vs. Labrador Retriever           | 2.44 | 1.351       | 4.402       | 0.013   |
| Border Collie vs. Medium size Spitz            | 3.37 | 1.514       | 7.505       | 0.013   |
| Border Collie vs. Miniature Schnauzer          | 2.47 | 1.291       | 4.707       | 0.022   |
| Border Collie vs. Other                        | 2.26 | 1.460       | 3.508       | 0.002   |
| Border Collie vs. Pembroke Welsh Corgi         | 6.18 | 2.257       | 16.907      | 0.003   |
| Border Collie vs. Rough Collie                 | 4.27 | 1.783       | 10.204      | 0.006   |
| Border Collie vs. Staff. Bull Terrier          | 2.73 | 1.305       | 5.710       | 0.025   |
| Border Collie vs. Wheaten Terrier              | 4.56 | 2.335       | 8.892       | < 0.001 |
| Cairn Terrier vs. Chihuahua                    | 0.13 | 0.046       | 0.361       | < 0.001 |
| Cairn Terrier vs. Chinese Crested Dog          | 0.20 | 0.075       | 0.509       | 0.005   |
| Cairn Terrier vs. Coton de Tuléar              | 0.25 | 0.091       | 0.703       | 0.027   |
| Cairn Terrier vs. German Shepherd Dog          | 0.18 | 0.073       | 0.467       | 0.003   |
| Cairn Terrier vs. Lapponian Herder             | 0.31 | 0.116       | 0.808       | 0.047   |
| Cairn Terrier vs. Shetland Sheepdog            | 0.14 | 0.055       | 0.345       | < 0.001 |
| Cairn Terrier vs. Spanish Water Dog            | 0.15 | 0.059       | 0.398       | < 0.001 |
| Chihuahua vs. Finnish Lapponian Dog            | 2.54 | 1.220       | 5.303       | 0.038   |
| Chihuahua vs. Golden Retriever                 | 3.37 | 1.297       | 8.755       | 0.038   |
| Chihuahua vs. Jack Russell Terrier             | 3.51 | 1.543       | 7.993       | 0.013   |
| Chihuahua vs. Labrador Retriever               | 3.41 | 1.578       | 7.369       | 0.009   |
| Chihuahua vs. Lagotto Romagnolo                | 2.75 | 1.244       | 6.078       | 0.038   |
| Chihuahua vs. Medium size Spitz                | 4.71 | 1.937       | 11.475      | 0.004   |
| Chihuahua vs. Miniature Poodle                 | 2.92 | 1.387       | 6.156       | 0.018   |
| Chihuahua vs. Miniature Schnauzer              | 3.45 | 1.618       | 7.344       | 0.007   |
| Chihuahua vs. Other                            | 3.17 | 1.696       | 5.907       | 0.002   |
| Chihuahua vs. Pembroke Welsh Corgi             | 8.64 | 2.935       | 25.423      | < 0.001 |
| Chihuahua vs. Rough Collie                     | 5.96 | 2.189       | 16.250      | 0.003   |
| Chihuahua vs. Staff. Bull Terrier              | 3.82 | 1.615       | 9.018       | 0.011   |
| Chihuahua vs. Wheaten Terrier                  | 6.37 | 2.858       | 14.206      | < 0.001 |
| Chinese Crested Dog vs. Medium size Spitz      | 3.12 | 1.387       | 7.020       | 0.021   |
| Chinese Crested Dog vs. Other                  | 2.10 | 1.265       | 3.469       | 0.016   |
| Chinese Crested Dog vs. Pembroke Welsh Corgi   | 5.72 | 2.071       | 15.794      | 0.005   |
| Chinese Crested Dog vs. Wheaten Terrier        | 4.22 | 2.072       | 8.588       | < 0.001 |
| Coton de Tuléar vs. Pembroke Welsh Corgi       | 4.41 | 1.506       | 12.932      | 0.023   |
| Coton de Tuléar vs. Wheaten Terrier            | 3.26 | 1.471       | 7.204       | 0.015   |
| Finnish Lapponian Dog vs. Pembroke Welsh Corgi | 3.40 | 1.267       | 9.108       | 0.043   |
| Finnish Lapponian Dog vs. Wheaten Terrier      | 2.51 | 1.390       | 4.515       | 0.010   |
| German Shepherd Dog vs. Miniature Poodle       | 2.05 | 1.138       | 3.679       | 0.047   |
| German Shepherd Dog vs. Pembroke Welsh Corgi   | 6.05 | 2.256       | 16.223      | 0.002   |
| German Shepherd Dog vs. Staff. Bull Terrier    | 2.67 | 1.316       | 5.430       | 0.022   |
| German Shepherd Dog vs. Wheaten Terrier        | 4.46 | 2.364       | 8.424       | < 0.001 |
| Golden Retriever vs. Shetland Sheepdog         | 0.32 | 0.140       | 0.709       | 0.019   |
| Jack Russell Terrier vs. German Shepherd Dog   | 0.41 | 0.203       | 0.813       | 0.035   |
| Jack Russell Terrier vs. Shetland Sheepdog     | 0.30 | 0.153       | 0.599       | 0.004   |
| Labrador Retriever vs. German Shepherd Dog     | 0.42 | 0.240       | 0.729       | 0.010   |
| Labrador Retriever vs. Shetland Sheepdog       | 0.31 | 0.174       | 0.558       | < 0.001 |
| Lagotto Romagnolo vs. Shetland Sheepdog        | 0.39 | 0.220       | 0.681       | 0.005   |
| Lagotto Romagnolo vs. Wheaten Terrier          | 2.32 | 1.197       | 4.485       | 0.038   |

|                                             |      |       |        |         |
|---------------------------------------------|------|-------|--------|---------|
| Lapponian Herder vs. Pembroke Welsh Corgi   | 3.64 | 1.306 | 10.145 | 0.039   |
| Lapponian Herder vs. Shetland Sheepdog      | 0.45 | 0.257 | 0.780  | 0.017   |
| Lapponian Herder vs. Wheaten Terrier        | 2.69 | 1.400 | 5.149  | 0.013   |
| Medium size Spitz vs. German Shepherd Dog   | 0.30 | 0.140 | 0.656  | 0.011   |
| Medium size Spitz vs. Shetland Sheepdog     | 0.23 | 0.105 | 0.483  | < 0.001 |
| Miniature Schnauzer vs. Chinese Crested Dog | 0.44 | 0.227 | 0.848  | 0.041   |
| Miniature Schnauzer vs. German Shepherd Dog | 0.41 | 0.224 | 0.765  | 0.018   |
| Miniature Schnauzer vs. Shetland Sheepdog   | 0.31 | 0.169 | 0.562  | < 0.001 |
| Other vs. German Shepherd Dog               | 0.45 | 0.306 | 0.665  | < 0.001 |
| Other vs. Shetland Sheepdog                 | 0.34 | 0.232 | 0.486  | < 0.001 |
| Other vs. Wheaten Terrier                   | 2.01 | 1.218 | 3.328  | 0.022   |
| Rough Collie vs. Chinese Crested Dog        | 0.25 | 0.100 | 0.644  | 0.015   |
| Rough Collie vs. German Shepherd Dog        | 0.24 | 0.103 | 0.559  | 0.005   |
| Rough Collie vs. Shetland Sheepdog          | 0.18 | 0.075 | 0.424  | < 0.001 |
| Rough Collie vs. Spanish Water Dog          | 0.20 | 0.080 | 0.491  | 0.003   |
| Shetland Sheepdog vs. Finnish Lapponian Dog | 2.39 | 1.481 | 3.868  | 0.003   |
| Shetland Sheepdog vs. Miniature Poodle      | 2.75 | 1.577 | 4.793  | 0.003   |
| Shetland Sheepdog vs. Pembroke Welsh Corgi  | 8.13 | 3.057 | 21.618 | < 0.001 |
| Shetland Sheepdog vs. Staff. Bull Terrier   | 3.59 | 1.861 | 6.931  | < 0.001 |
| Shetland Sheepdog vs. Wheaten Terrier       | 6.00 | 3.366 | 10.679 | < 0.001 |
| Smooth Collie vs. Shetland Sheepdog         | 0.37 | 0.176 | 0.766  | 0.025   |
| Spanish Water Dog vs. Finnish Lapponian Dog | 2.16 | 1.243 | 3.735  | 0.022   |
| Spanish Water Dog vs. Golden Retriever      | 2.86 | 1.218 | 6.695  | 0.045   |
| Spanish Water Dog vs. Jack Russell Terrier  | 2.98 | 1.430 | 6.193  | 0.015   |
| Spanish Water Dog vs. Labrador Retriever    | 2.89 | 1.521 | 5.490  | 0.006   |
| Spanish Water Dog vs. Lagotto Romagnolo     | 2.33 | 1.246 | 4.354  | 0.026   |
| Spanish Water Dog vs. Medium size Spitz     | 3.99 | 1.779 | 8.969  | 0.005   |
| Spanish Water Dog vs. Miniature Poodle      | 2.48 | 1.338 | 4.582  | 0.015   |
| Spanish Water Dog vs. Miniature Schnauzer   | 2.92 | 1.513 | 5.636  | 0.007   |
| Spanish Water Dog vs. Other                 | 2.68 | 1.699 | 4.231  | < 0.001 |
| Spanish Water Dog vs. Pembroke Welsh Corgi  | 7.32 | 2.655 | 20.176 | < 0.001 |
| Spanish Water Dog vs. Staff. Bull Terrier   | 3.23 | 1.591 | 6.572  | 0.006   |
| Spanish Water Dog vs. Wheaten Terrier       | 5.40 | 2.858 | 10.197 | < 0.001 |

Supplementary Table S4. Contrasts between levels of categorical variables in the 'fear of strangers' logistic regression analysis. P-values are controlled for false discovery rate except for *a priori* contrasts. *A priori* effects are denoted with \*. Significant effects are emboldened (p-value < 0.05). OR = odds ratio, CI = confidence limit. N = 5,932.

| Variable               | Contrast                                                                                                                                     | OR    | Lower 95%CI | Upper 95%CI  | p             |
|------------------------|----------------------------------------------------------------------------------------------------------------------------------------------|-------|-------------|--------------|---------------|
| Sex                    | Male vs. female                                                                                                                              | 0.85  | 0.728       | 0.981        | <b>0.027*</b> |
| Sterilisation          | Intact vs. neutered                                                                                                                          | 0.62  | 0.517       | 0.733        | <b>0.001</b>  |
| Body size              | Small vs. medium                                                                                                                             | 1.50  | 1.167       | 1.930        | <b>0.010</b>  |
|                        | Small vs. large                                                                                                                              | 1.25  | 0.996       | 1.570        | 0.055*        |
|                        | Medium vs. large                                                                                                                             | 0.83  | 0.656       | 1.060        | 0.322         |
| Activities/training    | Never/seldom vs. sometimes                                                                                                                   | 1.36  | 1.115       | 1.660        | <b>0.013</b>  |
|                        | Never/seldom vs. at least weekly                                                                                                             | 1.44  | 1.188       | 1.740        | <b>0.001</b>  |
|                        | Sometimes vs. at least weekly                                                                                                                | 1.05  | 0.877       | 1.270        | 0.746         |
| Family size            | Single vs. couple                                                                                                                            | 0.90  | 0.727       | 1.104        | 0.508         |
|                        | Single vs. one child                                                                                                                         | 0.79  | 0.594       | 1.038        | 0.236         |
|                        | Single vs. two children                                                                                                                      | 0.67  | 0.508       | 0.871        | <b>0.015</b>  |
|                        | Single vs. larger family                                                                                                                     | 0.74  | 0.559       | 0.967        | 0.091         |
|                        | Couple vs. one child                                                                                                                         | 0.88  | 0.688       | 0.118        | 0.504         |
|                        | Couple vs. two children                                                                                                                      | 0.74  | 0.590       | 0.936        | <b>0.046</b>  |
|                        | Couple vs. larger family                                                                                                                     | 0.82  | 0.648       | 1.040        | 0.261         |
|                        | One child vs. two children                                                                                                                   | 0.85  | 0.632       | 1.136        | 0.492         |
|                        | One child vs. larger family                                                                                                                  | 0.94  | 0.695       | 1.261        | 0.801         |
| Weaning age            | Two children vs. larger family                                                                                                               | 1.11  | 0.828       | 1.473        | 0.687         |
|                        | <7 weeks vs. at 7 weeks                                                                                                                      | 0.88  | 0.651       | 1.195        | 0.610         |
|                        | <7 weeks vs. at 8 weeks                                                                                                                      | 0.82  | 0.606       | 1.100        | 0.388         |
|                        | <7 weeks vs. > 8 weeks                                                                                                                       | 0.68  | 0.500       | 0.930        | 0.058         |
|                        | At 7 weeks vs. at 8 weeks                                                                                                                    | 0.93  | 0.770       | 1.113        | 0.606         |
|                        | At 7 weeks vs. > 8 weeks                                                                                                                     | 0.77  | 0.632       | 0.947        | <b>0.048</b>  |
|                        | At 8 weeks vs. > 8 weeks                                                                                                                     | 0.84  | 0.690       | 1.012        | 0.179         |
|                        | <7 weeks vs. 7-8 weeks                                                                                                                       | 0.85  | 0.637       | 1.130        | 0.262         |
| 7-8 weeks vs. >8 weeks | 0.80                                                                                                                                         | 0.676 | 0.957       | <b>0.014</b> |               |
| Breed                  | Chihuahua, Jack Russell Terrier, Lagotto Romagnolo, and Shetland Sheepdog vs. German Shepherd Dog, Golden Retriever, and Labrador Retriever. | 1.65  | 1.050       | 2.600        | <b>0.031*</b> |

Supplementary Table S5. Significant pairwise breed differences in the ‘fear of strangers’ analysis. All p-values are FDR-controlled. OR = odds ratio, CI = confidence limit. N = 5,932.

| <b>Breed contrast</b>                         | <b>OR</b> | <b>Lower 95%CI</b> | <b>Upper 95%CI</b> | <b>p</b> |
|-----------------------------------------------|-----------|--------------------|--------------------|----------|
| Border Collie vs. Chinese Crested Dog         | 0.28      | 0.124              | 0.635              | 0.013    |
| Border Collie vs. Shetland Sheepdog           | 0.19      | 0.096              | 0.394              | 0.001    |
| Border Collie vs. Spanish Water Dog           | 0.17      | 0.082              | 0.364              | 0.001    |
| Chihuahua vs. Shetland Sheepdog               | 0.30      | 0.138              | 0.664              | 0.014    |
| Chihuahua vs. Spanish Water Dog               | 0.27      | 0.118              | 0.613              | 0.010    |
| Chinese Crested Dog vs. Finnish Lapponian Dog | 4.03      | 1.909              | 8.498              | 0.002    |
| Chinese Crested Dog vs. German Shepherd Dog   | 2.87      | 1.411              | 5.824              | 0.016    |
| Chinese Crested Dog vs. Labrador Retriever    | 4.02      | 1.934              | 8.352              | 0.001    |
| Chinese Crested Dog vs. Lapponian Herder      | 2.92      | 1.325              | 6.428              | 0.032    |
| Chinese Crested Dog vs. Other                 | 2.93      | 1.678              | 5.105              | 0.001    |
| Chinese Crested Dog vs. Wheaten Terrier       | 4.44      | 2.024              | 9.722              | 0.001    |
| Coton de Tuléar vs. Shetland Sheepdog         | 0.37      | 0.172              | 0.794              | 0.042    |
| Coton de Tuléar vs. Spanish Water Dog         | 0.33      | 0.147              | 0.733              | 0.028    |
| German Shepherd Dog vs. Shetland Sheepdog     | 0.24      | 0.136              | 0.431              | 0.001    |
| Golden Retriever vs. Shetland Sheepdog        | 0.25      | 0.115              | 0.529              | 0.002    |
| Jack Russell Terrier vs. Chinese Crested Dog  | 0.25      | 0.106              | 0.599              | 0.010    |
| Jack Russell Terrier vs. Shetland Sheepdog    | 0.18      | 0.079              | 0.389              | 0.001    |
| Labrador Retriever vs. Shetland Sheepdog      | 0.17      | 0.094              | 0.316              | 0.001    |
| Lagotto Romagnolo vs. Shetland Sheepdog       | 0.31      | 0.169              | 0.582              | 0.001    |
| Lapponian Herder vs. Shetland Sheepdog        | 0.24      | 0.127              | 0.443              | 0.001    |
| Medium size Spitz vs. Shetland Sheepdog       | 0.31      | 0.147              | 0.670              | 0.014    |
| Miniature Schnauzer vs. Finnish Lapponian Dog | 2.80      | 1.380              | 5.675              | 0.019    |
| Miniature Schnauzer vs. Labrador Retriever    | 2.79      | 1.403              | 5.558              | 0.016    |
| Miniature Schnauzer vs. Other                 | 2.03      | 1.234              | 3.351              | 0.024    |
| Miniature Schnauzer vs. Wheaten Terrier       | 3.08      | 1.461              | 6.499              | 0.015    |
| Other vs. Shetland Sheepdog                   | 0.24      | 0.162              | 0.346              | 0.001    |
| Rough Collie vs. Chinese Crested Dog          | 0.29      | 0.126              | 0.648              | 0.014    |
| Rough Collie vs. Shetland Sheepdog            | 0.20      | 0.097              | 0.403              | 0.001    |
| Rough Collie vs. Spanish Water Dog            | 0.18      | 0.083              | 0.373              | 0.001    |
| Shetland Sheepdog vs. Finnish Lapponian Dog   | 5.81      | 3.291              | 10.263             | 0.001    |
| Shetland Sheepdog vs. Miniature Poodle        | 2.88      | 1.595              | 5.192              | 0.003    |
| Shetland Sheepdog vs. Wheaten Terrier         | 6.40      | 3.449              | 11.876             | 0.001    |
| Smooth Collie vs. Chinese Crested Dog         | 0.31      | 0.131              | 0.729              | 0.030    |
| Smooth Collie vs. Shetland Sheepdog           | 0.21      | 0.100              | 0.455              | 0.001    |
| Smooth Collie vs. Spanish Water Dog           | 0.19      | 0.086              | 0.420              | 0.001    |
| Spanish Water Dog vs. Finnish Lapponian Dog   | 6.53      | 3.519              | 12.131             | 0.001    |
| Spanish Water Dog vs. German Shepherd Dog     | 4.65      | 2.486              | 8.698              | 0.001    |
| Spanish Water Dog vs. Golden Retriever        | 4.57      | 2.053              | 10.161             | 0.001    |
| Spanish Water Dog vs. Jack Russell Terrier    | 6.43      | 2.793              | 14.790             | 0.001    |
| Spanish Water Dog vs. Labrador Retriever      | 6.52      | 3.395              | 12.519             | 0.001    |
| Spanish Water Dog vs. Lagotto Romagnolo       | 3.58      | 1.849              | 6.948              | 0.001    |
| Spanish Water Dog vs. Lapponian Herder        | 4.73      | 2.426              | 9.239              | 0.001    |
| Spanish Water Dog vs. Medium size Spitz       | 3.59      | 1.615              | 7.967              | 0.010    |
| Spanish Water Dog vs. Miniature Poodle        | 3.24      | 1.713              | 6.111              | 0.002    |
| Spanish Water Dog vs. Miniature Schnauzer     | 2.34      | 1.196              | 4.556              | 0.048    |
| Spanish Water Dog vs. Other                   | 4.75      | 3.030              | 7.439              | 0.001    |
| Spanish Water Dog vs. Wheaten Terrier         | 7.20      | 3.707              | 13.962             | 0.001    |

Supplementary Table S6. Behavioural, environmental, and demographic variables derived from the owner-filled online canine behaviour questionnaire.

| <b>Variable</b>         | <b>Explanation</b>                                                                                                                                                                                                                                                                                                                                                                                                                                                                                                 |
|-------------------------|--------------------------------------------------------------------------------------------------------------------------------------------------------------------------------------------------------------------------------------------------------------------------------------------------------------------------------------------------------------------------------------------------------------------------------------------------------------------------------------------------------------------|
| Fear of dogs            | Binomial (event/non-event) variable. Fearful dogs are reported to indicate fear of strange dogs often (40-100% of occasions) (event). Non-fearful dogs are not reported to indicate any fear of strange dogs nor have ever barked or growled to strange dogs (non-event).                                                                                                                                                                                                                                          |
| Fear of strangers       | Binomial (event/non-event) variable. Fearful dogs are reported to indicate fear of strangers often (40-100% of occasions) (event). Non-fearful dogs are not reported to indicate any fear of strangers nor have ever barked or growled to strangers (non-event).                                                                                                                                                                                                                                                   |
| Socialisation score     | Continuous variable. A sum of the frequencies of how often (0 = never; 1 = 1-2 times during the puppyhood; 2 = 1-2 times during the puppyhood to 2 times per month; 3 = twice a month to twice a week; 4 = twice a week to once a day; 5 = several times a day) the dog met unfamiliar men, women and children, unfamiliar adult dogs, visited city or other place with traffic and many people, and travelled by car and bus when the dog was 7-16 weeks old. Minimum score 0, maximum score 35.                  |
| Urban environment score | Continuous variable. Describes the environmental land-use around the dog's home. The geographical coordinates for each home were derived from the addresses provided by the owners. The coverage of three land-use types (artificial surfaces, agricultural areas, forests and semi-natural areas) were calculated using CORINE2012 within a three-kilometre range around the homes. Through PCA, the coverages were simplified into one continuous variable, where higher scores indicate more urban environment. |
| Activities/training     | Categorical variable. Describes how often the dog participates in activities or training. 1: never/seldom, 2: sometimes, 3: at least weekly.                                                                                                                                                                                                                                                                                                                                                                       |
| Daily exercise          | Categorical variable. Describes the amount of dog's daily exercise in hours. 1: < 1 hour, 2: 1-2 hours, 3: 2-3 hours, 4: > 3 hours.                                                                                                                                                                                                                                                                                                                                                                                |
| Owner's dog experience  | Binomial variable. Describes the owner's experience with dogs. 1: the dog is the owner's first dog, 2: the dog is not the owner's first dog.                                                                                                                                                                                                                                                                                                                                                                       |
| Dogs in the family      | Binomial variable. Describes the number of dogs in the family. 1: the dog is the only dog in the family, 2: there are other dogs in the family.                                                                                                                                                                                                                                                                                                                                                                    |
| Family size             | Categorical variable. Describes the size of the family where the dog lives. 1: single, 2: couple, 3: family with one or two adults and one child, 4: family with one or two adults and two children, 5: family with two or more adults and/or two or more children.                                                                                                                                                                                                                                                |
| Weaning age             | Categorical variable. The weaning ages were divided into four categories: 1: < 7 weeks of age, 2: at 7 weeks of age, 3: at 8 weeks of age, 4: > 8 weeks of age.                                                                                                                                                                                                                                                                                                                                                    |
| Daily time spent alone  | Categorical variable. Describes the daily time that dog spends alone at home without the presence of people. 1: < 3 hours, 2: 3-6 hours, 3: 6-8 hours, 4: > 8 hours.                                                                                                                                                                                                                                                                                                                                               |
| Body size               | Categorical variable. Dogs were divided into three different body size categories, small, medium and large, based on the average height of the breed. Small, $\leq 35$ cm; medium, 36-49 cm; large, $\geq 50$ cm.                                                                                                                                                                                                                                                                                                  |



Supplementary Table S7. The AIC model selection and the final models in the logistic regression analyses. N(fear of dogs) = 5,343, N(fear of strangers) = 5,858.

| <b>Fear of dogs</b>                                                                                                                                                                                   |               |                 |                           |               |                     |                               |                           |  |
|-------------------------------------------------------------------------------------------------------------------------------------------------------------------------------------------------------|---------------|-----------------|---------------------------|---------------|---------------------|-------------------------------|---------------------------|--|
| Model                                                                                                                                                                                                 | AIC           | Body size added | Socialisation score added | Breed added   | Sterilisation added | Urban environment score added | Activities/training added |  |
| Basic model (sex, age)                                                                                                                                                                                | 5237.3        |                 |                           |               |                     |                               |                           |  |
| Body size                                                                                                                                                                                             | <b>5014.6</b> | 5014.6          |                           |               |                     |                               |                           |  |
| Socialisation score                                                                                                                                                                                   | 5159.5        | <b>4932.4</b>   |                           |               |                     |                               |                           |  |
| Breed                                                                                                                                                                                                 | 5095.2        | 4943            | <b>4859.8</b>             |               |                     |                               |                           |  |
| Sterilisation                                                                                                                                                                                         | 5198.5        | 4980.1          | 4898.6                    | <b>4822.5</b> |                     |                               |                           |  |
| Urban environment score                                                                                                                                                                               | 5197.2        | 5001            | 4898.2                    | 4823.5        | <b>4789.1</b>       |                               |                           |  |
| Activities/training                                                                                                                                                                                   | 5164.3        | 4981            | 4904.1                    | 4828.1        | 4796.9              | <b>4767.6</b>                 |                           |  |
| Daily exercise                                                                                                                                                                                        | 5187.7        | 4992.7          | 4919.8                    | 4849.8        | 4813.9              | 4784.2                        | <b>4764.3</b>             |  |
| Owner's dog experience                                                                                                                                                                                | 5229.7        | 5015.7          | 4930.7                    | 4857.7        | 4821.9              | 4790.6                        | 4769.3                    |  |
| Dogs in the family                                                                                                                                                                                    | 5236.8        | 5016            | 4932.1                    | 4856.7        | 4819.9              | 4790.2                        | 4769.5                    |  |
| Family size                                                                                                                                                                                           | 5243.8        | 5020.3          | 4937.2                    | 4865.6        | 4827.5              | 4791                          | 4770.4                    |  |
| Weaning age                                                                                                                                                                                           | 5229.9        | 5016.2          | 4935.9                    | 4863          | 4825.7              | 4792.5                        | 4771.9                    |  |
| Daily time spent alone                                                                                                                                                                                | 5241.3        | 5018.6          | 4936.8                    | 4864.5        | 4827                | 4793.2                        | 4771.9                    |  |
| <i>The interaction term between sex and sterilisation was significant and improved the AIC value of the model, and thus the interaction term (sex*sterilisation) was included in the final model.</i> |               |                 |                           |               |                     |                               |                           |  |
| Sex*sterilisation                                                                                                                                                                                     |               |                 |                           |               |                     |                               | <b>4752.1</b>             |  |

Final model: sex, age, body size, socialisation score, breed, sterilisation, urban environment score, activities/training, daily exercise, sex\*sterilisation.

| <b>Fear of strangers</b>                                                                                                                             |               |                           |               |                     |                           |                               |                 |                   |
|------------------------------------------------------------------------------------------------------------------------------------------------------|---------------|---------------------------|---------------|---------------------|---------------------------|-------------------------------|-----------------|-------------------|
| Model                                                                                                                                                | AIC           | Socialisation score added | Breed added   | Sterilisation added | Activities/training added | Urban environment score added | Body size added | Weaning age added |
| Basic model (sex, age)                                                                                                                               | 4960.5        |                           |               |                     |                           |                               |                 |                   |
| Socialisation score                                                                                                                                  | <b>4833.2</b> | 4833.2                    |               |                     |                           |                               |                 |                   |
| Breed                                                                                                                                                | 4862          | <b>4733.8</b>             |               |                     |                           |                               |                 |                   |
| Sterilisation                                                                                                                                        | 4923.9        | 4798.4                    | <b>4698.2</b> |                     |                           |                               |                 |                   |
| Activities/training                                                                                                                                  | 4920.8        | 4803.3                    | 4708.5        | <b>4677.9</b>       |                           |                               |                 |                   |
| Urban environment score                                                                                                                              | 4957.9        | 4813.6                    | 4718.7        | 4685.3              | <b>4667.9</b>             |                               |                 |                   |
| Body size                                                                                                                                            | 4926          | 4798.6                    | 4722.6        | 4686                | 4670.4                    | <b>4661.5</b>                 |                 |                   |
| Weaning age                                                                                                                                          | 4943.7        | 4822.8                    | 4726.7        | 4690.8              | 4672.6                    | 4663.1                        | <b>4657.4</b>   |                   |
| Family size                                                                                                                                          | 4962.1        | 4832.7                    | 4734.2        | 4697.2              | 4678.1                    | 4664.6                        | 4657.7          | <b>4653.8</b>     |
| Daily exercise                                                                                                                                       | 4953.1        | 4832.1                    | 4735.7        | 4700.8              | 4681.2                    | 4672.4                        | 4666.1          | 4661.7            |
| Daily time spent alone                                                                                                                               | 4961.6        | 4831.9                    | 4733.8        | 4697.5              | 4677                      | 4667.2                        | 4660.9          | 4656.9            |
| Owner's dog experience                                                                                                                               | 4960.2        | 4828.7                    | 4731.2        | 4697.4              | 4678.2                    | 4669.4                        | 4663.2          | 4659.1            |
| Dogs in the family                                                                                                                                   | 4960.2        | 4829.4                    | 4728.5        | 4693.9              | 4677.1                    | 4668.9                        | 4662.4          | 4658.6            |
| <i>The interaction term between sex and sterilisation was tested but not included in the final model as it increased the AIC value of the model.</i> |               |                           |               |                     |                           |                               |                 |                   |
| Sex*sterilisation                                                                                                                                    |               |                           |               |                     |                           |                               |                 | 4654.5            |

Final model: sex, age, socialisation score, breed, sterilisation, activities/training, urban environment score, body size, weaning age, family size.

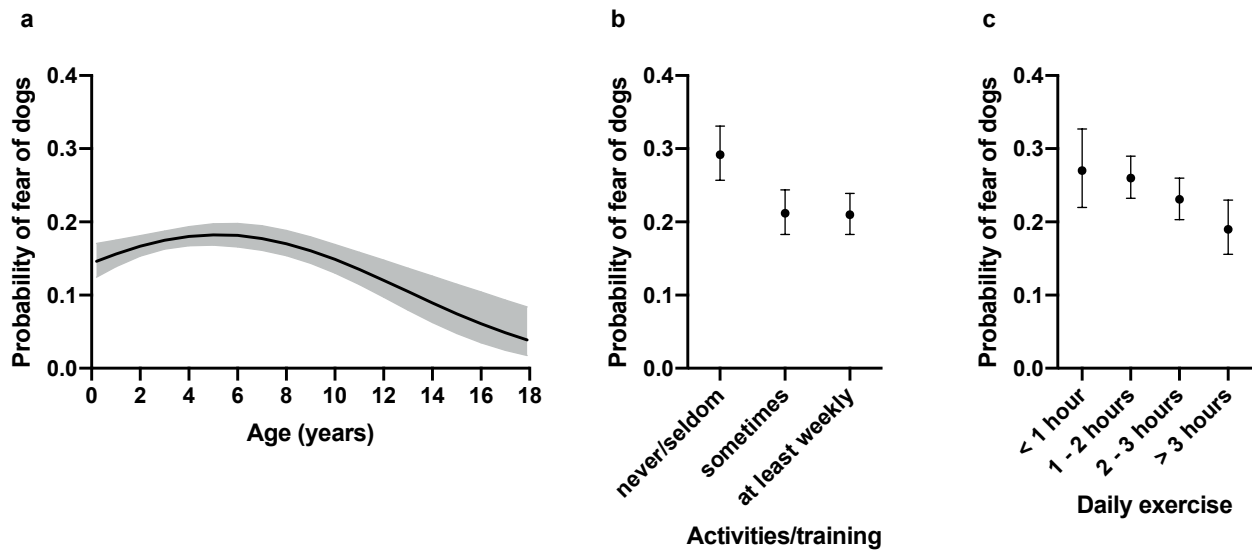

Supplementary Figure S1. The effects of age, activities/training, and daily exercise on fear of dogs in the logistic regression analysis. **(a)** Older dogs were less fearful as the likelihood of fear of dogs decreased after six years of age. **(b)** Dogs that participated in activities or training never or seldom were more afraid of dogs than dogs participating in activities sometimes or at least weekly. **(c)** Dogs getting less than one hour of daily exercise showed a higher likelihood of fear of dogs than dogs exercising more than three hours per day. In addition, dogs getting 1-2 hours of daily exercise showed a higher likelihood of fear of dogs than dogs exercising more than three hours per day. Grey lines (a) and error bars (b, c) indicate 95% confidence limits. N = 5,973.

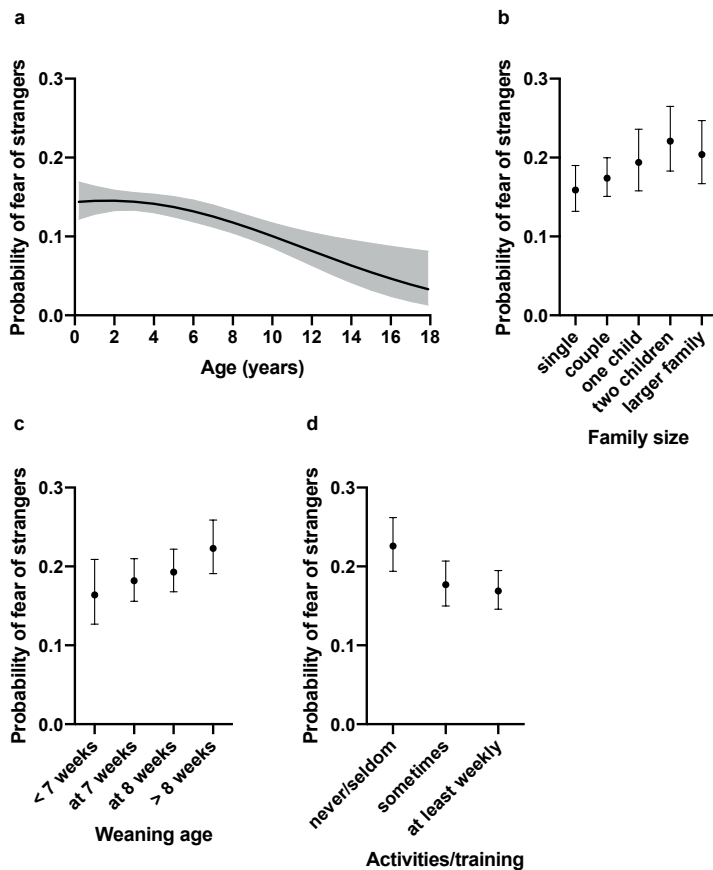

Supplementary Figure S2. The effects of age, family size, weaning age, and activities/training on fear of strangers in the logistic regression analysis. **(a)** Older dogs were less fearful as the likelihood of fear of strangers decreased after four years of age. However, the association between age and fear of strangers was not significant. **(b)** Dogs living with one ('single') or two adults ('couple') were less likely afraid of strangers than dogs living in families with one or two adults and two children ('two children'). **(c)** Dogs weaned later than eight weeks of age were more likely afraid of strangers than dogs weaned at seven weeks of age. **(d)** Dogs that participated in activities or training never or seldom were more afraid of strangers than dogs participating in activities sometimes or at least weekly. Grey lines (a) and error bars (b, c, d) indicate 95% confidence limits. N = 5,973.
